# Supplementary material for: Optimization of heteronuclear ultrafast 2D NMR for the study of complex mixtures hyperpolarized by dynamic nuclear polarization
Source: Royal Society of Chemistry journal article supplement (doi:10.1039/d3ay01681a), 2023-01-01
Supplement: d3ay01681a1.pdf [file d3ay01681a1.pdf]

Electronic Supplementary Material (ESI) for Analytical Methods

This journal is © The Royal Society of Chemistry 2023

## Optimization of heteronuclear ultrafast 2D NMR for the study of complex mixtures hyperpolarized by dynamic nuclear polarization

Clément Praud,<sup>a</sup> Victor Ribay,<sup>a</sup> Arnab Dey,<sup>a</sup> Benoît Charrier,<sup>a</sup> Joris Mandral,<sup>a</sup> Jonathan Farjon,<sup>a</sup> Jean-Nicolas Dumez<sup>a</sup> and Patrick Giraudeau<sup>a\*</sup>

<sup>a</sup> Nantes Université, CNRS, CEISAM, UMR 6230, F-44000 Nantes, France

\*patrick.giraudeau@univ-nantes.fr

### Index

|                                                                                                          |    |
|----------------------------------------------------------------------------------------------------------|----|
| 1. Sample preparation.....                                                                               | 2  |
| 2. Hellmanex® Treatment.....                                                                             | 2  |
| 3. 10-metabolites mixture.....                                                                           | 3  |
| 4. Chemical shifts assignment.....                                                                       | 4  |
| 5. Reference HMBC in MeOD.....                                                                           | 5  |
| 6. Stabilization effect in dissolution in D <sub>2</sub> O.....                                          | 7  |
| 7. Triplicate experiments comparison.....                                                                | 7  |
| 8. Stabilization effect in dissolution in MeOD.....                                                      | 8  |
| 9. Comparison <sup>1</sup> H reference spectra in MeOD and in D <sub>2</sub> O.....                      | 8  |
| 10. Linear regression plots for metabolites in D <sub>2</sub> O (not described in the main article)..... | 9  |
| 11. Linear regression plots for all metabolites in MeOD and the corresponding result Table.....          | 10 |
| 12. Repeatability assessment at 25 mM, close to the mean LOQ determined in D <sub>2</sub> O.....         | 11 |

## 1. Sample preparation

|                        | 200 mM<br>Sample | 10 metabolite stock solutions at different concentrations |       |       |       |       | 25 mM<br>sample |
|------------------------|------------------|-----------------------------------------------------------|-------|-------|-------|-------|-----------------|
| Sample ID              | 200 mM           | LOQ1                                                      | LOQ2  | LOQ3  | LOQ4  | LOQ5  | 25 mM           |
| Lactate (mg)           | 170.0            | 45.9                                                      | 35.6  | 22.3  | 16.1  | 5.0   | 7.1             |
| [Lac] (mM)             | 201.9            | 165.3                                                     | 126.0 | 79.3  | 54.9  | 17.8  | 24.98           |
| Arginine (mg)          | 263.0            | 52.9                                                      | 34.8  | 17.8  | 8.3   | 71.0  | 11.2            |
| [Arg] (mM)             | 200.9            | 122.6                                                     | 79.5  | 40.8  | 18.1  | 162.3 | 25.30           |
| Succinic Acid (mg)     | 182.7            | 25.9                                                      | 12.0  | 9.5   | 49.0  | 36.0  | 8.5             |
| [Suc] (mM)             | 205.9            | 88.3                                                      | 40.3  | 31.9  | 158.5 | 121.4 | 28.73           |
| Alanine (mg)           | 147.7            | 26.5                                                      | 18.2  | 8.8   | 4.1   | 35.8  | 5.7             |
| [Ala] (mM)             | 220.6            | 119.9                                                     | 81.1  | 39.3  | 17.6  | 160.0 | 25.08           |
| Citric acid (mg)       | 289.9            | 19.7                                                      | 10.0  | 83.9  | 57.2  | 38.5  | 294.7           |
| [Cit] (mM)             | 200.8            | 41.4                                                      | 20.7  | 174.0 | 113.9 | 79.7  | 605.50          |
| Glycolic acid (mg)     | 114.1            | 15.0                                                      | 7.4   | 5.5   | 32.8  | 24.2  | 6.8             |
| [Gly] (mM)             | 199.6            | 79.3                                                      | 38.4  | 28.5  | 164.8 | 126.4 | 35.14           |
| Creatinine (mg)        | 169.2            | 11.3                                                      | 6.3   | 45.1  | 34.0  | 22.9  | 8.4             |
| [Crea] (mM)            | 199.0            | 40.2                                                      | 22.2  | 158.7 | 114.7 | 80.6  | 29.14           |
| Pyruvate (mg)          | 165.0            | 5.21                                                      | 44.1  | 40.2  | 22.8  | 12.1  | 7.0             |
| [Pyr] (mM)             | 199.5            | 19.1                                                      | 159.3 | 145.5 | 79.0  | 43.6  | 25.08           |
| Aminobutyric Acid (mg) | 166.0            | 41.5                                                      | 30.9  | 24.0  | 9.4   | 6.4   | 7.7             |
| [Amino] (mM)           | 214.2            | 162.4                                                     | 117.6 | 92.7  | 35.0  | 24.6  | 29.44           |
| Acetate (mg)           | 125.2            | 4.8                                                       | 32.8  | 24.7  | 16.7  | 9.3   | 6.0             |
| [Ace] (mM)             | 203.1            | 23.8                                                      | 158.6 | 120.1 | 77.8  | 45.3  | 28.73           |
| Tempol (mg)            | 64.6             | 22.1                                                      | 21.7  | 22.8  | 23.9  | 23.9  | 23.4            |
| [TEMPOL] (mM)          | 49.9             | 51.8                                                      | 50.0  | 52.6  | 53.0  | 55.1  | 53.63           |

*Table S1: Composition of stock solutions, with the weighted mass (in mg) and concentration (in mM and in orange) of each metabolite once dissolved in the DNP juice (glycerol- $d_8$ :D<sub>2</sub>O:MilliQ water – 60:30:10 v/v%). The 200 mM sample was prepared with 200 mM of each metabolite, then five stock solutions were made with metabolite concentrations ranging from 160 to 20 mM and finally a 25 mM sample was studied with 25 mM of each metabolite (except for Citric acid with a concentration of 600 mM).*

## 2. Hellmanex® Treatment

We first prepared an Hellmanex® solution by adding 2% by volume Hellmanex® III solution from Hellma Analytics (<https://www.hellma.com/en/laboratory-supplies/cuvettes/hellmanex/>) in deionized water. Then, NMR tubes were filled with this solution, and placed in a water bath at 40 °C for 40 min. After that, tubes were emptied and rinsed with deionized water twice. Finally, NMR tubes were dried in an oven at 40 °C overnight. A freshly treated NMR tube was used with each dissolution.

### 3. 10-metabolites mixture

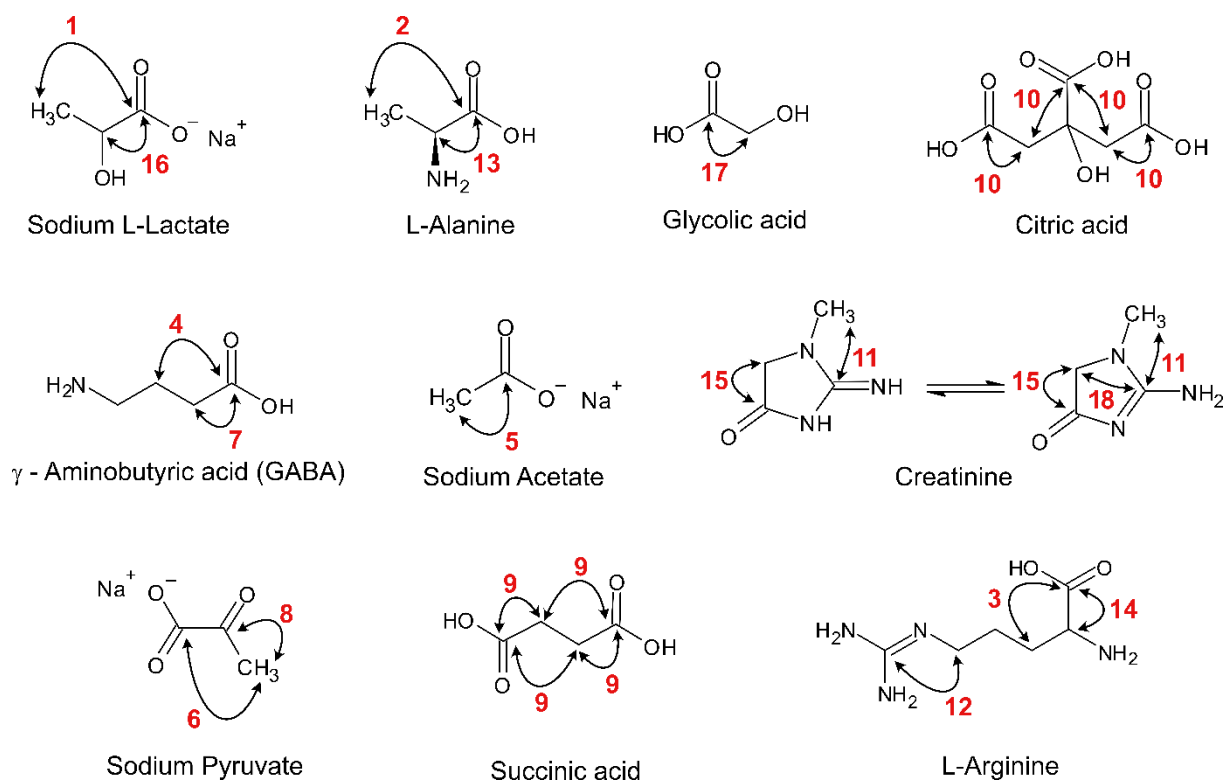

Fig. S1: Illustration of the 10 metabolites studied in this feature article, with the corresponding  $J_{CH}$  correlations detailed in the Table S2.

#### 4. Chemical shifts assignment

| Labels | Correlations                                                  | Reference conventional HMBC spectrum (D <sub>2</sub> O) |                             | Reference conventional HMBC spectrum (MeOD) |                             |
|--------|---------------------------------------------------------------|---------------------------------------------------------|-----------------------------|---------------------------------------------|-----------------------------|
|        |                                                               | $\delta^1\text{H}$ (ppm)                                | $\delta^{13}\text{C}$ (ppm) | $\delta^1\text{H}$ (ppm)                    | $\delta^{13}\text{C}$ (ppm) |
| 1      | Lactate ( $^3\text{J}_{\text{CH}}$ )                          | 1.195                                                   | 183.57                      | 1.193                                       | 183.13                      |
| 2      | Alanine ( $^3\text{J}_{\text{CH}}$ )                          | 1.326                                                   | 177.58                      | 1.327                                       | 177.57                      |
| 3      | Arg ( $^3\text{J}_{\text{CH}}$ )                              | 1.758                                                   | 176.18                      | N/A                                         | N/A                         |
| 4      | GABA ( $^3\text{J}_{\text{CH}}$ )                             | 1.767                                                   | 181.45                      | 1.761                                       | 180.71                      |
| 5      | Ace ( $^2\text{J}_{\text{CH}}$ )                              | 1.883                                                   | 180.10                      | 1.840                                       | 178.83                      |
| 6      | Pyr ( $^3\text{J}_{\text{CH}}$ )                              | 2.200                                                   | 206.83                      | 2.162                                       | 206.31                      |
| 7      | GABA ( $^2\text{J}_{\text{CH}}$ )                             | 2.236                                                   | 181.46                      | 2.231                                       | 180.68                      |
| 8      | Pyr ( $^2\text{J}_{\text{CH}}$ )                              | 2.201                                                   | 171.88                      | 2.161                                       | 172.50                      |
| 9      | Suc ( $^2\text{J}_{\text{CH}}$ and $^3\text{J}_{\text{CH}}$ ) | 2.421                                                   | 180.83                      | 2.391                                       | 179.93                      |
|        |                                                               | 2.563                                                   | 181.33                      | 2.525                                       | 182.18                      |
| 10     | Cit ( $^2\text{J}_{\text{CH}}$ and $^3\text{J}_{\text{CH}}$ ) | 2.563                                                   | 177.76                      | 2.525                                       | 178.41                      |
|        |                                                               | 2.677                                                   | 181.33                      | 2.638                                       | 182.18                      |
|        |                                                               | 2.677                                                   | 177.76                      | 2.638                                       | 178.41                      |
| 11     | Crea ( $^3\text{J}_{\text{CH}}$ )                             | 2.967                                                   | 161.65                      | 2.932                                       | 169.12                      |
| 12     | Arg ( $^3\text{J}_{\text{CH}}$ )                              | 3.086                                                   | 158.66                      | 3.070                                       | 160.03                      |
| 13     | Ala ( $^2\text{J}_{\text{CH}}$ )                              | 3.631                                                   | 177.57                      | 3.526                                       | 177.81                      |
| 14     | Arg ( $^2\text{J}_{\text{CH}}$ )                              | 3.615                                                   | 176.22                      | 3.525                                       | 175.95                      |
| 15     | Crea ( $^2\text{J}_{\text{CH}}$ )                             | 3.837                                                   | 181.07                      | 3.895                                       | 185.25                      |
| 16     | Lac ( $^2\text{J}_{\text{CH}}$ )                              | 4.005                                                   | 183.56                      | 3.943                                       | 183.13                      |
| 17     | Gly ( $^2\text{J}_{\text{CH}}$ )                              | 4.075                                                   | 170.14                      | 3.792                                       | 180.88                      |
| 18     | Crea ( $^3\text{J}_{\text{CH}}$ )                             | 4.076                                                   | 161.65                      | 3.893                                       | 169.06                      |

Table S2: Chemical shift assignments for all reported peaks on the d-DNP UF 2D experiments after dissolutions in D<sub>2</sub>O and MeOD. Peaks were assigned thanks to conventional HMBC experiments and the use of internal standards (data not shown).

## 5. IMPACT-HMBC experiment

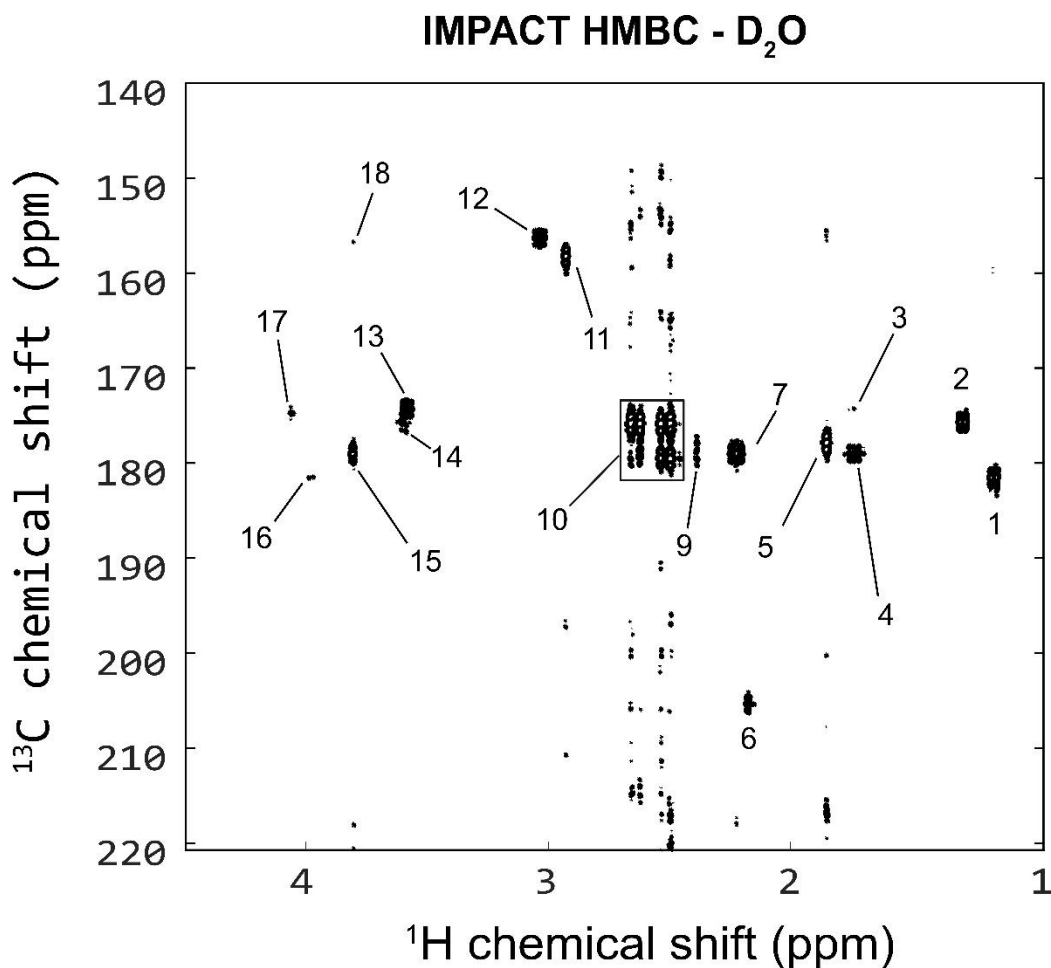

Fig. S2: IMPACT-HMBC experiment of a 200 mM 10-metabolite mixture in D<sub>2</sub>O, recorded in 20 minutes and 34 seconds on a 400 MHz spectrometer equipped with a nitrogen-cooled cryoprobe and at 298 K. The pulse sequence included a 40 ms DIPSI-2 scheme during the recycling time to allow a short inter-scan delay of 0.25 s, and an Ernst angle pulse at 120° was used for the first pulse applied on the <sup>1</sup>H channel. The spectrum was recorded with 25% non-uniform sampling, 128  $t_1$  increments and 54 scans per increment, and an acquisition time of 0.3 seconds. The spectral widths were 15.6 x 90 ppm in the <sup>1</sup>H and <sup>13</sup>C dimensions, centred at 2.5 and 175 ppm, respectively. GARP decoupling was applied on the <sup>13</sup>C channel during <sup>1</sup>H detection, using a band selective Reburp.1000 shaped pulse of 650  $\mu$ s applied on quaternary carbons. A long-range coupling delay of 33 ms was used, as for the UF HETCOR experiment. Compared to the original IMPACT-HMBC (Ref. 59 in the main article) experiment, the pulse sequence was not constant-time and did not include a <sup>1</sup>J<sub>CH</sub> filter, since those elements led to a decrease in sensitivity for the peaks of interest.

## 6. Reference HMBC in MeOD

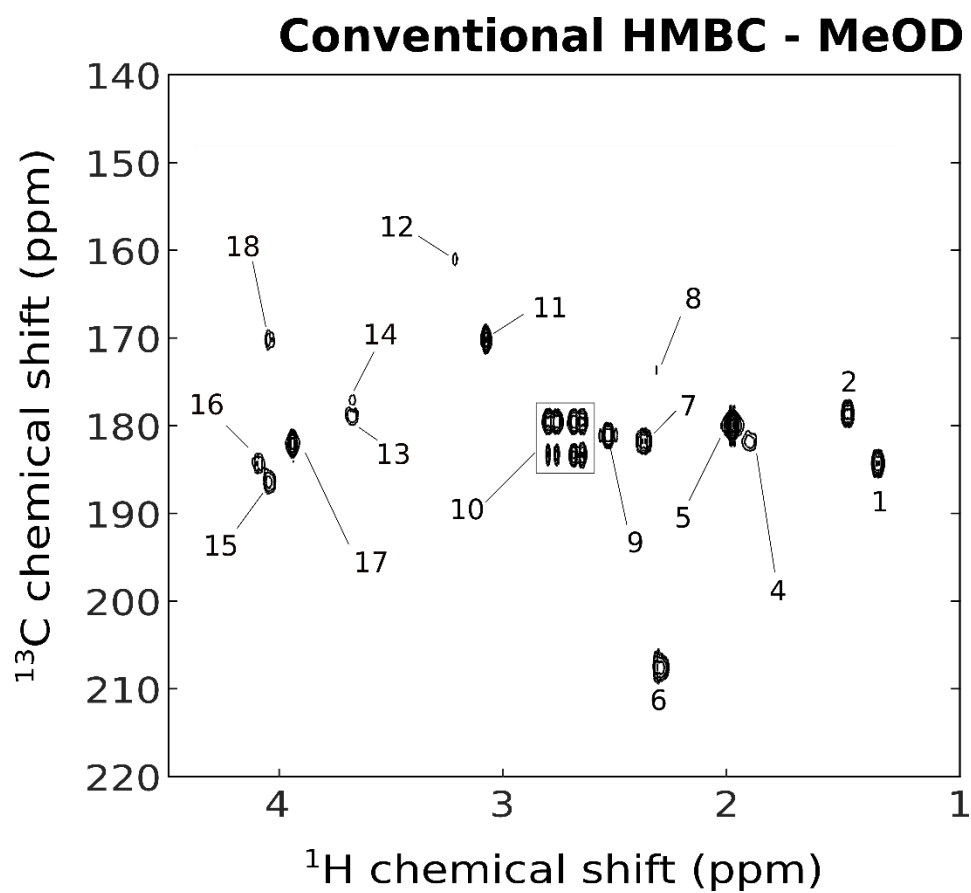

Fig. S3: Reference spectrum acquired at 400 MHz with a conventional HMBC pulse sequence in 3 hours with 4 scans and 512  $t_1$  increments on 10-metabolites mixture sample dissolved in MeOD. Individual metabolite concentrations are at 100 mM. Labels are detailed in Table S2.

## 7. Stabilization effect in dissolution in D<sub>2</sub>O

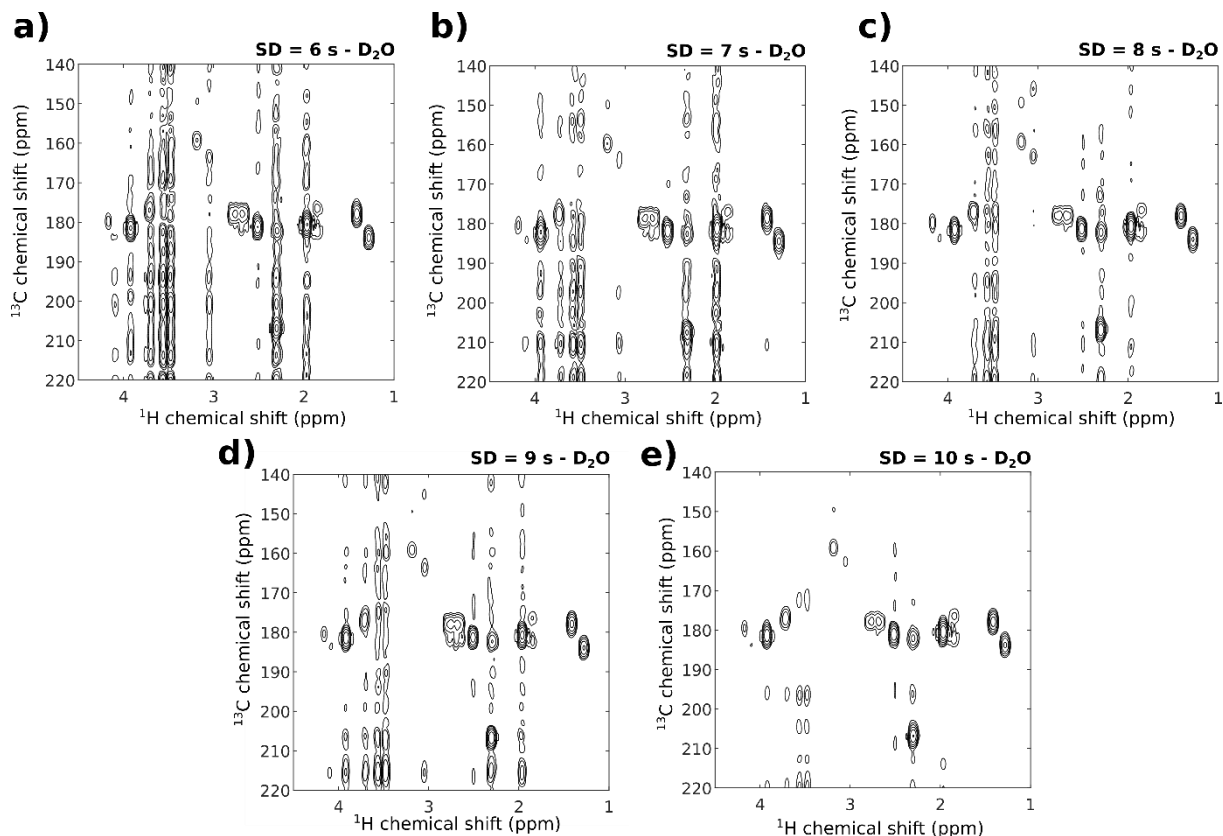

Fig. S4: UF long-range HETCOR spectra recorded after 21 minutes of hyperpolarization, 3.2 seconds of transfer and 6 to 10 seconds of stabilization delay respectively (from a to e). Each experiment has been recorded after a dissolution in D<sub>2</sub>O solvent, on a 400 MHz equipped with a BBO prodigy probe at 298 K.

## 8. Triplicate experiments comparison

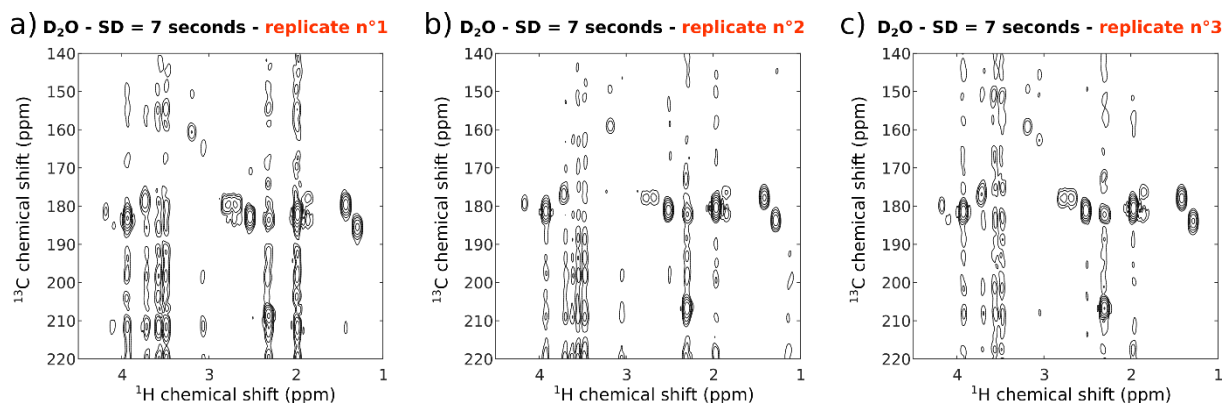

Fig. S5: UF long-range HETCOR spectra recorded after 21 minutes of hyperpolarization, 3.2 seconds of transfer and 7 seconds of stabilization delay (SD) respectively on the 10-metabolites mixture at 200 mM (input). These triplicate experiments were recorded after D<sub>2</sub>O dissolution, on a 400 MHz equipped with a BBO prodigy probe at 298 K.

## 9. Stabilization effect in dissolution in MeOD

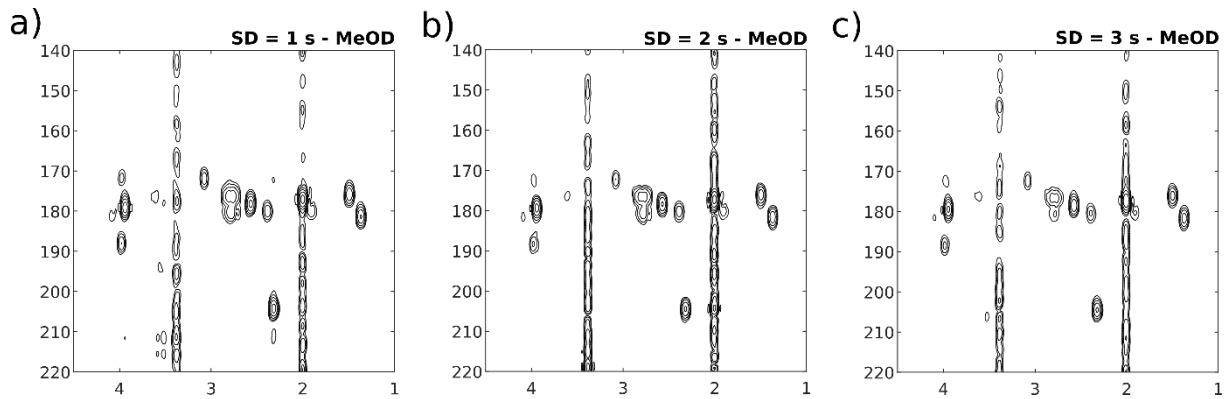

Fig. S6: UF long-range HETCOR spectra recorded after 21 minutes of hyperpolarization, 3.2 seconds of transfer and 1 to 3 seconds of stabilization delay (SD) respectively (from a to c). Each experiment has been recorded after a dissolution in MeOD solvent, on a 400 MHz equipped with a BBO prodigy probe at 293 K.

## 10. Comparison <sup>1</sup>H reference spectra in MeOD and in D<sub>2</sub>O

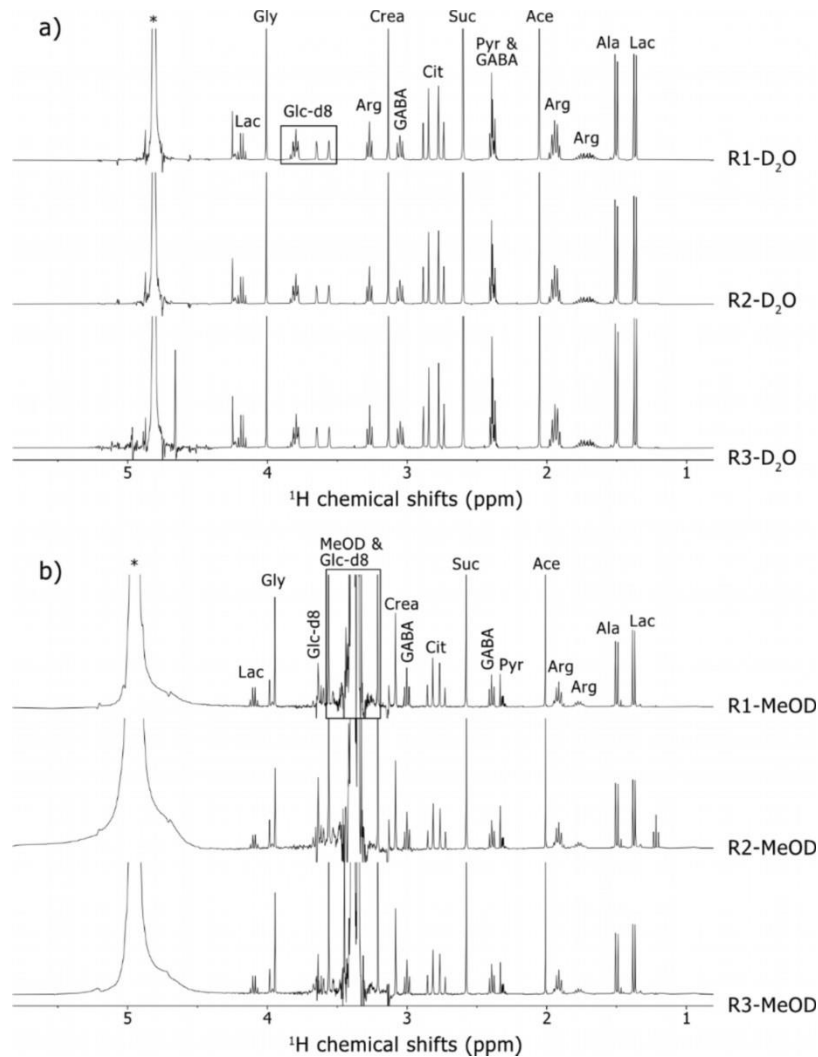

Fig. S7: <sup>1</sup>H reference spectra recorded at thermal equilibrium following d-DNP experiments (about 5 minutes after dissolution) on the post-dissolution NMR tube containing the 10-metabolites sample at 200 mM after dissolution. Individual metabolite concentration is about 3 mM in D<sub>2</sub>O samples and 1.6 mM in MeOD ones, considering the dilution factors induced by the dissolution process and the metabolite solubility. a) Triplicates recorded after



dissolution in D<sub>2</sub>O and b) after dissolution in MeOD. Spectra were processed the same way, aligned and normalized by the same scale for comparison. \* corresponds to the residual water signal. Glc-d8 stands for glycerol-d<sub>8</sub>.

### 11. Linear regression plots for metabolites in D<sub>2</sub>O (not described in the main article)

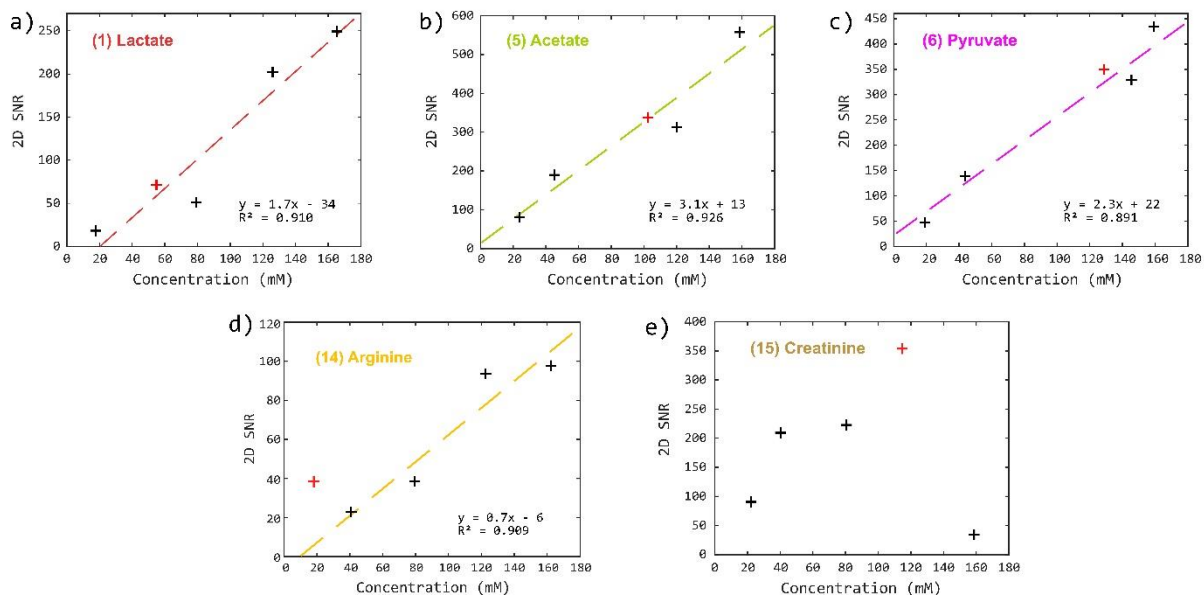

Fig. S8: Additional linear regressions for a) lactate (1), b) acetate (5), c) pyruvate (6), d) arginine (14) and creatinine (15) correlation signals, plotting 2D SNR of each 2D correlation with respect to their metabolite concentration in mM. Label correspondences are given in Table S2. No linear regression was performed for creatine (15) for the reason explained in the manuscript.

## 12. Linear regression plots for all metabolites in MeOD and the corresponding result Table.

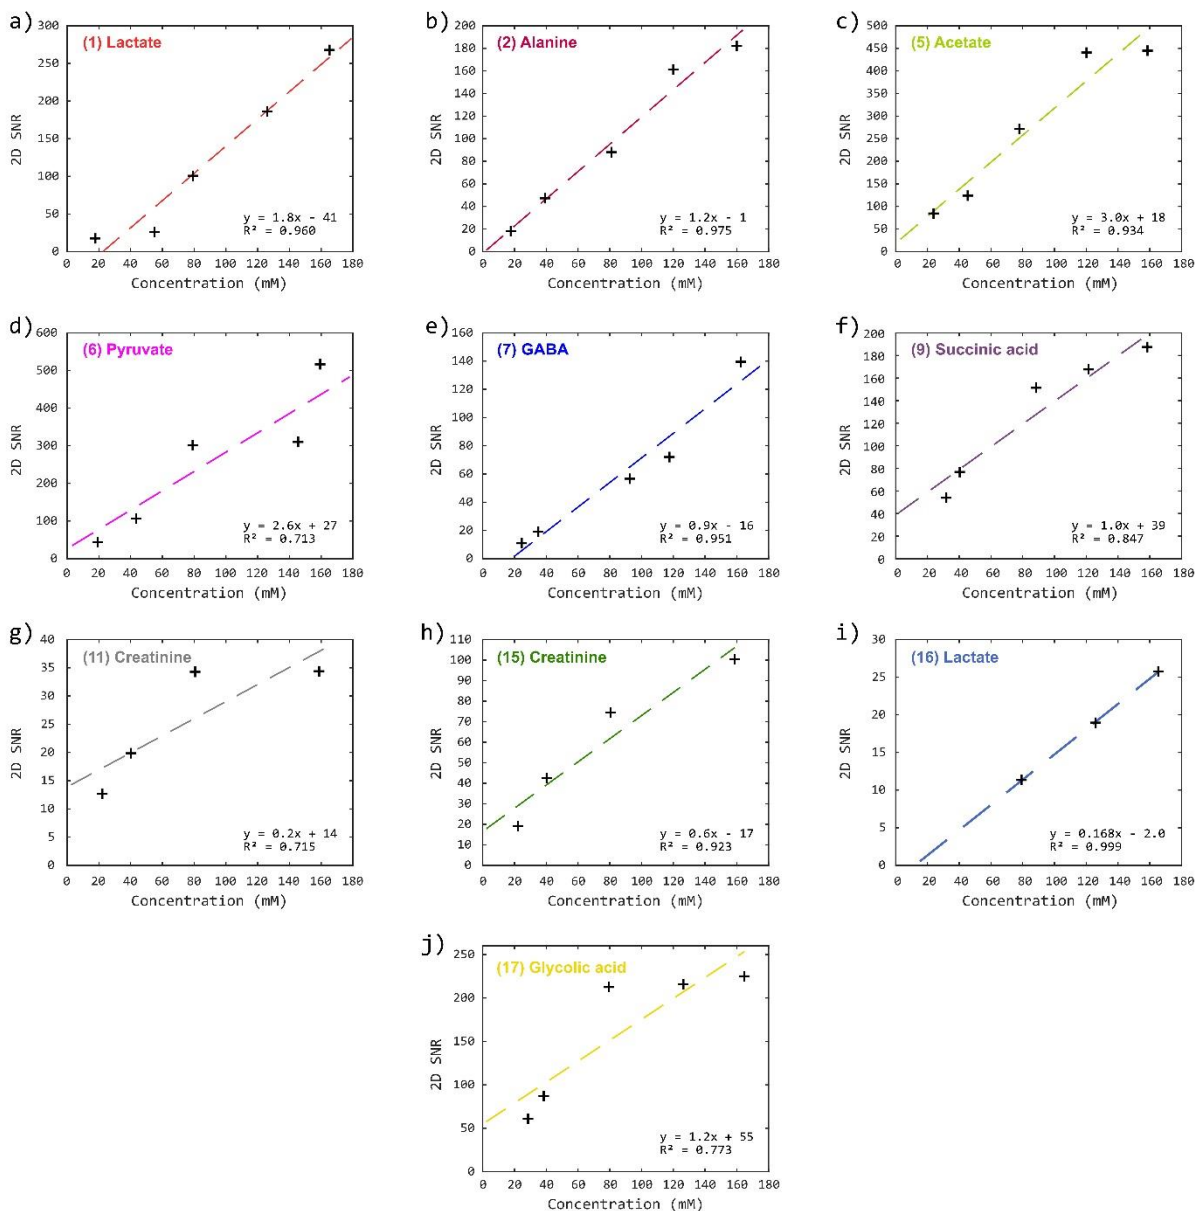

Fig. S9: Linear regressions for lactate (1 and 16), alanine (2), acetate (5), pyruvate (6), GABA (7), succinic acid (9), creatinine (11 and 15) and glycolic acid (17) correlation signals, plotting 2D SNR of each 2D correlation with respect to their metabolite concentration in mM. Label correspondences are given in **the Table S2**. Creatinine (11) and (15) and lactate (16) 2D correlation SNR regressions were plotted with less than 5 points, as their 2D SNR were below the limit of detection (2D SNR < 3) for the lowest concentrated samples.

| Peak | Metabolite                            | Slope       | y-intercept | R <sup>2</sup> | LOQ <sub>calc</sub> (input/ mM) |
|------|---------------------------------------|-------------|-------------|----------------|---------------------------------|
| 1    | Lac ( <sup>3</sup> J <sub>CH</sub> )  | 1.8 ± 0.2   | -41 ± 22    | 0.960          | 28                              |
| 2    | Ala ( <sup>3</sup> J <sub>CH</sub> )  | 1.2 ± 0.1   | -2 ± 11     | 0.975          | 9.5                             |
| 5    | Ace ( <sup>2</sup> J <sub>CH</sub> )  | 3 ± 1       | 18 ± 45     | 0.934          | 2.8                             |
| 6    | Pyr ( <sup>2</sup> J <sub>CH</sub> )  | 3 ± 1       | 27 ± 99     | 0.902          | 6.5                             |
| 7    | GABA ( <sup>2</sup> J <sub>CH</sub> ) | 0.9 ± 0.1   | -16 ± 12    | 0.951          | 30                              |
| 9    | Suc ( <sup>2</sup> J <sub>CH</sub> )  | 1.0 ± 0.2   | 39 ± 25     | 0.847          | 29                              |
| 11   | Crea ( <sup>3</sup> J <sub>CH</sub> ) | 0.2 ± 0.1   | 14 ± 6      | 0.715          | 26                              |
| 15   | Crea ( <sup>2</sup> J <sub>CH</sub> ) | 0.6 ± 0.1   | 17 ± 11     | 0.923          | 12                              |
| 16   | Lac ( <sup>2</sup> J <sub>CH</sub> )  | 0.17 ± 0.03 | -2.0 ± 0.4  | 0.999          | 72                              |
| 17   | Gly ( <sup>2</sup> J <sub>CH</sub> )  | 1.2 ± 0.4   | 55 ± 38     | 0.773          | 37                              |

Table S3: Linear regression equations. R<sup>2</sup> and calculated LOQ for 10 chemical sites, among 8 metabolites after dissolutions performed in MeOD solvent. LOQ is calculated by solving the linear regression equations with y = 10 (approximation of the SNR value that should correspond to the lower concentration that can be quantified with the method). It corresponds to the minimal input concentration that can be prepared in the DNP cup to have final signal 2D SNR of at least 10. ΔLOQ corresponds to the uncertainty of the LOQ calculation, determined by the linear fit.

### 13. Repeatability assessment at 25 mM, close to the mean LOQ determined in D<sub>2</sub>O

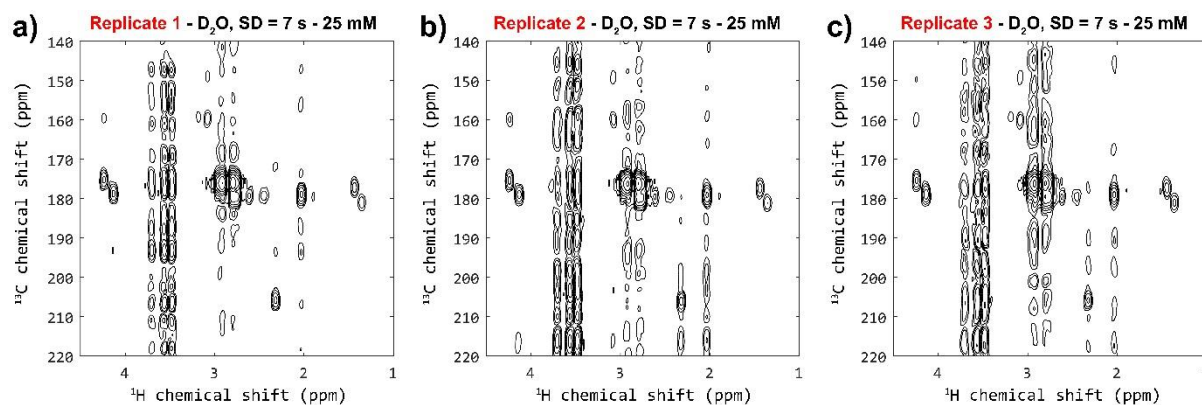

Fig. S10: UF long-range HETCOR spectra recorded after 20 min of hyperpolarization, 3.2 s of transfer and 7 seconds of stabilization in D<sub>2</sub>O, on the same 10-metabolites mixture prepared at 25 mM each, and dissolved with 50 mM TEMPOL in the DNP juice. Liquid-state NMR detection was performed at 400 MHz, with a BBO prodigy probe and at 298 K.
